# Supplementary material for: Treatment patterns of biologics in US patients with ankylosing spondylitis: descriptive analyses from a claims database
Source: Atypon-hosted journal article supplement (doi:10.2217/cer-2017-0076), 2017-11-17
Supplement: supplementary_material.docx [file supplementary_material.docx]

**Supplementary materials**

**Figure S1.** Schematic representation of the observation period*.


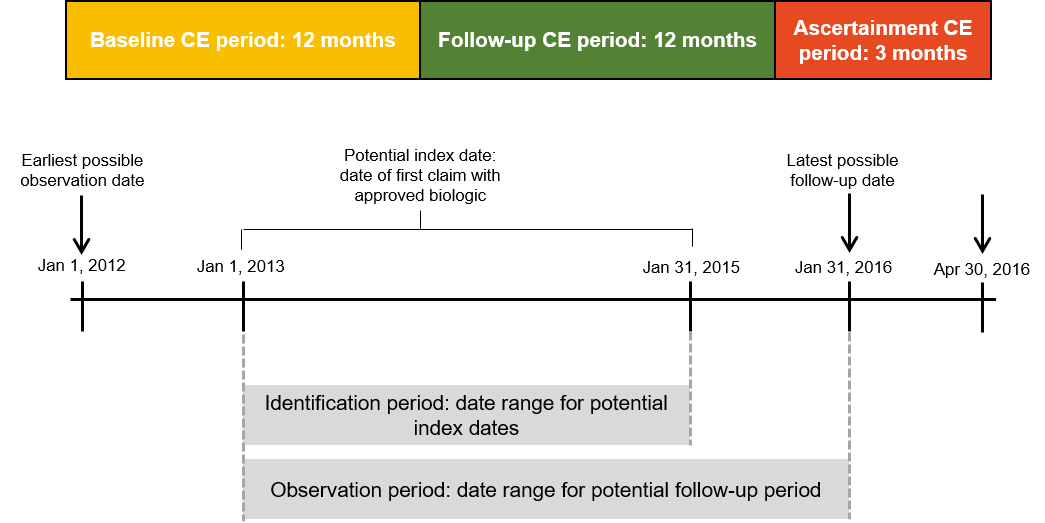


*Patients were required to have ≥ 2 non−rule-out diagnoses for ankylosing spondylitis during the study. The 2 claims had to be ≥ 30 days apart, and the first claim had to be on the index date or during the baseline period.

| **Table S1.** **Adherence and duration of persistence.** | | | | | | |
| --- | --- | --- | --- | --- | --- | --- |
|  | **Total**  **(N = 426)** | **TNFi-SC** | | | | **TNFi-IV** |
| **Adalimumab**  **(n = 122)** | **Certolizumab pegol**  **(n = 12)** | **Etanercept**  **(n = 192)** | **Golimumab**  **(n = 50)** | **Infliximab**  **(n = 50)** |
| Duration of persistence, days | | | | | | |
| Mean (SD) | 236 (131) | 243 (132) | 208 (143) | 192 (131) | 248 (132) | 249 (127) |
| Median (IQR) | 274 (105, 365) | 289 (100, 365) | 199 (64, 365) | 234 (405, 365) | 343 (127, 365) | 294 (128, 365) |
| Proportion of days covered* | | | | | | |
| Mean (SD) | 0.56 (0.29) | 0.58 (0.29) | 0.47 (0.32) | 0.55 (0.30) | 0.56 (0.29) | 0.60 (0.29) |
| Median (IQR) | 0.60 (0.30, 0.84) | 0.65 (0.31, 0.85) | 0.45 (0.15, 0.77) | 0.59 (0.30, 0.84) | 0.61 (0.30, 0.85) | 0.68 (0.27, 0.84) |
| *Proportion of days covered was defined as the number of days covered by prescription claims for the index TNFi divided by 365 (follow-up period).  IV: Intravenous; SC: Subcutaneous; TNFi: Tumor necrosis factor inhibitor. | | | | | | |

| **Table S2. Inflammatory conditions among patients during the 12 months before and 12 months after the index date.** | | | | | | |
| --- | --- | --- | --- | --- | --- | --- |
| **Inflammatory conditions, n (%)*** | **Total**  **(N = 426)** | **TNFi-SC** | | | | **TNFi-IV** |
| **Adalimumab**  **(n = 122)** | **Certolizumab Pegol**  **(n = 12)** | **Etanercept**  **(n = 192)** | **Golimumab**  **(n = 50)** | **Infliximab**  **(n = 50)** |
| **Ulcerative colitis** | 26 (6.1) | 8 (6.6) | 2 (16.7) | 6 (3.1) | 4 (8.0) | 6 (12.0) |
| **Crohn disease** | 23 (5.4) | 6 (4.9) | 6 (50.0) | 5 (2.6) | 0 (0.0) | 6 (12.0) |
| **Psoriasis** | 13 (3.0) | 5 (4.1) | 2 (16.7) | 1 (0.5) | 3 (6.0) | 2 (4.0) |
| *Inflammatory conditions were defined with at least one claim anywhere in the 12 months before and after the index date.  IV: Intravenous; SC: Subcutaneous; TNFi: Tumor necrosis factor inhibitor. | | | | | | |

**Figure S2.** Dose escalation of the index TNFi in the 12-month follow-up period.


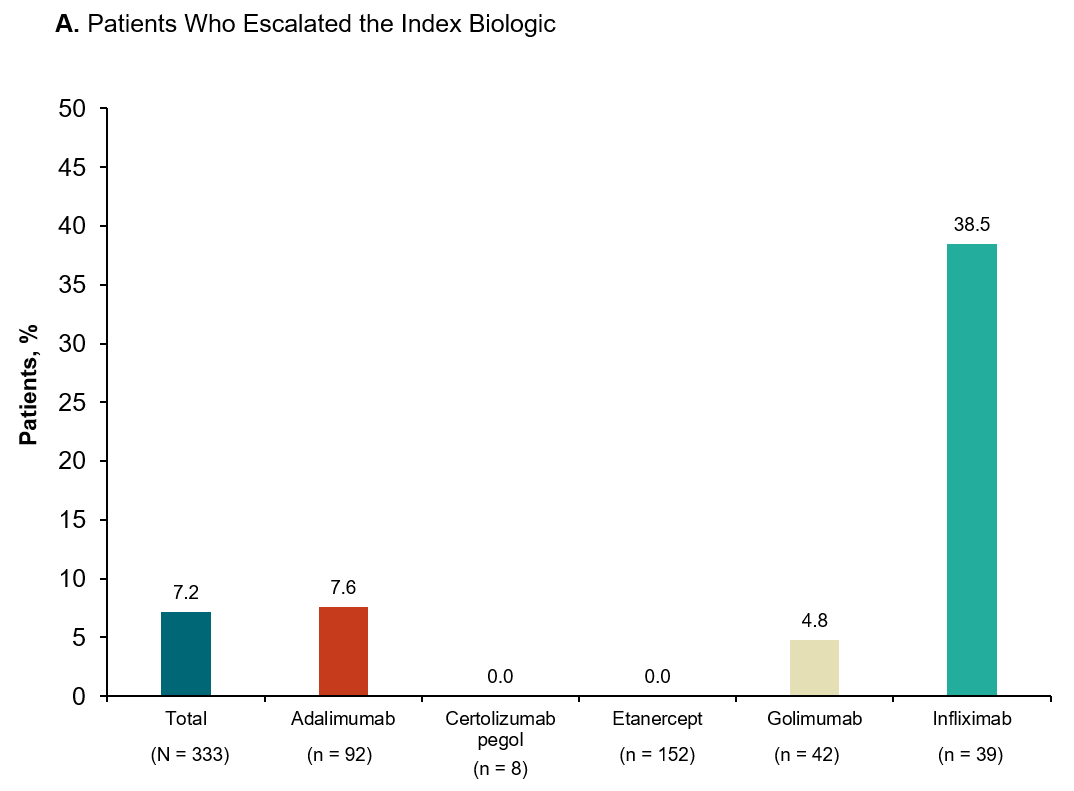


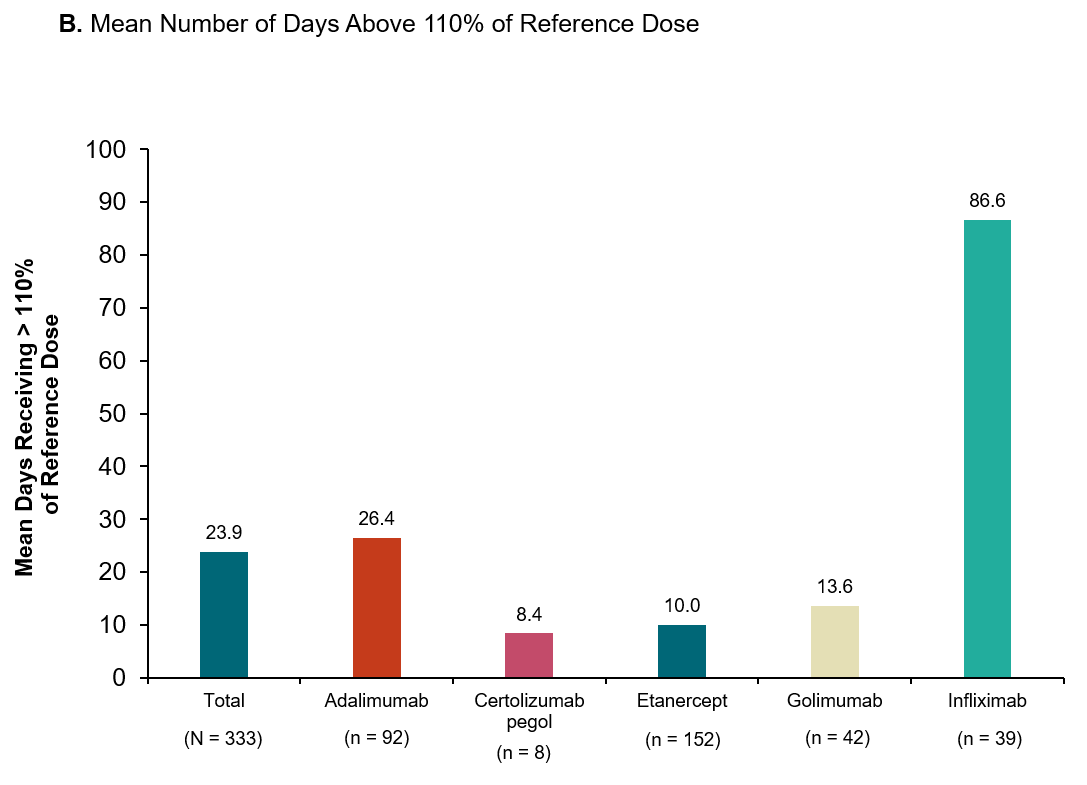


TNFi: Tumor necrosis factor inhibitor.
